# Supplementary material
Source: PubMed Central journal article supplement (PMC8727796)
Supplement: ajcr0011-5881-f17.pdf [file ajcr0011-5881-f17.pdf]

## HDAC2 phosphorylation in drug-resistant melanoma

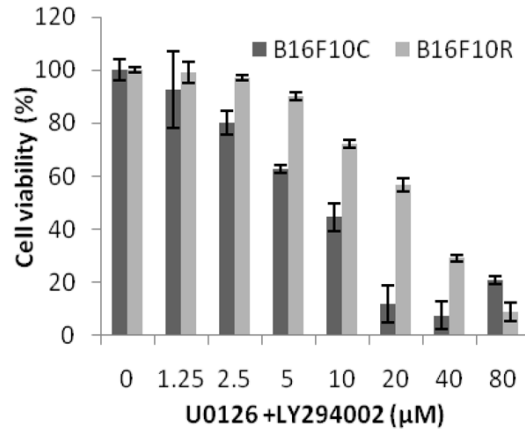

**Supplementary Figure 1.** Effects of the drug combination on the proliferation of B16F10. The parental (B16F10C) and resistant melanoma (B16F10R) cells were treated with the drug combination at various concentrations (0.62-80 µM). This figure is the results of the MTT assay- parental (dark bars) and resistant (light bars). Data shown are means  $\pm$  SEM of three replicate wells. Graphs were plotted with concentration of the inhibitor (X-axis) Vs cell viability % (Y-axis) and the  $IC_{50}$  values were calculated using the formula  $y = b + ax$ .  $IC_{50}$  values are the concentration of the drug combination which results in 50% cell death.

## HDAC2 phosphorylation in drug-resistant melanoma

**Supplementary Table 1.** List of novel phosphosites (n=74) on 47 proteins identified in 95 proteins from LC-MS and bioinformatic analyses

| SR NO | GENE ID  | DESCRIPTION                                                               | PHOSPOSITES                                  |
|-------|----------|---------------------------------------------------------------------------|----------------------------------------------|
| 1     | Bclaf1   | bcl-2-associated transcription factor 1 isoform 1                         | S395(100); T400(100)]                        |
| 2     | Map4k4   | Mitogen-activated protein kinase kinase kinase 4 isoform X1               | S787(98.7)]                                  |
| 3     | Psip1    | PC4 and SFRS1-interacting protein isoform 1                               | S272(99.9); S274(100)]                       |
| 4     | Iws1     | protein IWS1 homolog [Mus musculus]                                       | S343(100); S345(100)]                        |
| 5     | Eif5b    | eukaryotic translation initiation factor 5B                               | S184(100); S187(100); S191(100)]             |
| 6     | Pnn      | pinin                                                                     | S701(100); S704(99)]                         |
| 7     | Nvl      | nuclear valosin-containing protein-like                                   | S190(100)]                                   |
| 8     | Ctr9     | RNA polymerase-associated protein CTR9 homolog                            | S1079(100); S1083(98)]                       |
| 9     | Larp1    | la-related protein 1                                                      | S826(96.1); S828(95.4)]                      |
| 10    | Top2b    | DNA topoisomerase 2-beta                                                  | S1539(100)]                                  |
| 11    | Psip1    | PC4 and SFRS1-interacting protein isoform 1                               | S272(99.9); S274(100)]                       |
| 12    | Ubap2l   | PREDICTED: ubiquitin-associated protein 2-like isoform X1                 | S644(95.8); S/Y/T]                           |
| 13    | Eif4g1   | PREDICTED: eukaryotic translation initiation factor 4 gamma 1 isoform X2  | S708(100)]                                   |
| 14    | Rcc2     | protein RCC2                                                              | S48(99.9); S49(99.9)]                        |
| 15    | Cdc42bpb | PREDICTED: serine/threonine-protein kinase MRCK beta isoform X1           | S1705(100); S1709(100)]                      |
| 16    | Safb     | scaffold attachment factor B1 isoform X1                                  | S577(98.7)]                                  |
| 17    | Chd4     | chromodomain-helicase-DNA-binding protein 4 isoform X1 [Mus musculus]     | S1563(100)]                                  |
| 18    | Acin1    | apoptotic chromatin condensation inducer in the nucleus isoform 2         | S1003(100)]                                  |
| 19    | Gatad2b  | transcriptional repressor p66-beta                                        | T121(100); S123(100); S130(100); S136(96.6)] |
| 20    | Ddx46    | probable ATP-dependent RNA helicase DDX46                                 | S102(100); S104(98.8); S106(100)]            |
| 21    | Scrib    | protein scribble homolog isoform 2                                        | S1292(100)]                                  |
| 22    | Nop2     | PREDICTED: probable 28S rRNA (cytosine-C(5))-methyltransferase isoform X1 | T169(100)]                                   |
| 23    | Ppig     | PREDICTED: peptidyl-prolyl cis-trans isomerase G isoform X1               | S354(100); T356(100)]                        |
| 24    | Mlit4    | PREDICTED: afadin isoform X1                                              | S1180(97.9); S1190(100)]                     |
| 25    | Eif3b    | eukaryotic translation initiation factor 3 subunit B                      | S68(100); S79(96.9); S84(97)]                |
| 26    | Hmga2    | high mobility group protein HMGI-C                                        | S104(99.9)]                                  |
| 27    | Hirip3   | HIRA-interacting protein 3                                                | S205(100); S207(100); S208(100)]             |
| 28    | Fip1l1   | PREDICTED: pre-mRNA 3'-end-processing factor FIP1 isoform X1              | S502(100)]                                   |
| 29    | Ythdc1   | PREDICTED: YTH domain-containing protein 1 isoform X1                     | S528(100)]                                   |
| 30    | Lrrc47   | leucine-rich repeat-containing protein 47                                 | S430(100)]                                   |
| 31    | Casc3    | protein CASC3                                                             | S145(100)]                                   |
| 32    | Rbm17    | splicing factor 45                                                        | S155(100)]                                   |
| 33    | Gigyf2   | PERQ amino acid-rich with GYF domain-containing protein 2 isoform b       | S237(100)]; 159032016 1xPhospho              |
| 34    | Stim1    | PREDICTED: stromal interaction molecule 1 isoform X2                      | S550(100)]                                   |
| 35    | Map2     | PREDICTED: microtubule-associated protein 2 isoform X1                    | S1814(96.6); S1819(98.3); S1822(100); S/T]   |
| 36    | Chchd6   | MICOS complex subunit Mic25 isoform 1                                     | S164(100)]                                   |
| 37    | Dnaja2   | dnaJ homolog subfamily A member 2                                         | S394(99.6); S395(99.6)]                      |
| 38    | Ppfia1   | PREDICTED: liprin-alpha-1 isoform X1                                      | S797(98.8)]                                  |
| 39    | Srrm1    | serine/arginine repetitive matrix protein 1 isoform 1                     | T600(100); S602(100)]                        |
| 40    | Tjp2     | PREDICTED: tight junction protein ZO-2 isoform X1                         | S188(100)]                                   |
| 41    | Map4     | PREDICTED: microtubule-associated protein 4 isoform X1                    | S1250(98.3)]                                 |
| 42    | Nedd4l   | PREDICTED: E3 ubiquitin-protein ligase NEDD4-like isoform X1              | S502(100)]                                   |
| 43    | Larp7    | la-related protein 7                                                      | S253(99.9); S256(99.9)]                      |
| 44    | Pum2     | pumilio homolog 2 isoform 1                                               | S177(100); S181(100)]                        |
| 45    | Rrbp1    | ribosome-binding protein 1 isoform a                                      | S625(98.8)]                                  |
| 46    | Srrm2    | PREDICTED: serine/arginine repetitive matrix protein 2 isoform X1         | S2681(99)]                                   |
| 47    | Bin1     | myc box-dependent-interacting protein 1 isoform 1                         | S332(98.1); S/T]                             |
